1 **Asymmetric transcallosal conduction delay leads to finer bimanual coordination**

2

3

4 Marta Bortoletto<sup>1\*</sup>, Laura Bonzano<sup>2</sup>, Agnese Zazio<sup>1</sup>, Clarissa Ferrari<sup>3</sup>, Ludovico Pedullà<sup>4</sup>, Roberto  
5 Gasparotti<sup>5</sup>, Carlo Miniussi<sup>1,6</sup>, Marco Bove<sup>4,7\*</sup>

6

7 <sup>1</sup> Neurophysiology Lab, IRCCS Istituto Centro San Giovanni di Dio Fatebenefratelli, Brescia, Italy

8 <sup>2</sup> Department of Neuroscience, Rehabilitation, Ophthalmology, Genetics, Maternal and Child Health,  
9 University of Genoa, Genoa, Italy

10 <sup>3</sup> Statistics Unit, IRCCS Istituto Centro San Giovanni di Dio Fatebenefratelli, Brescia, Italy

11 <sup>4</sup> Department of Experimental Medicine, Section of Human Physiology, University of Genoa, Genoa,  
12 Italy

13 <sup>5</sup> Department of Medical and Surgical Specialties, Radiological Sciences, and Public Health, Section  
14 of Neuroradiology, University of Brescia, Brescia, Italy

15 <sup>6</sup> CIMeC, Center for Mind/Brain Sciences, University of Trento, Rovereto, Italy

16 <sup>7</sup> Ospedale Policlinico San Martino-IRCCS, Genoa, Italy

17

18 \* Corresponding authors:

19 dr. Marta Bortoletto

20 Neurophysiology Lab, IRCCS Istituto Centro San Giovanni di Dio Fatebenefratelli

21 Via Pilastroni 4, 25125 Brescia, Brescia, Italy.

22 Tel.: +390303501597; fax: +390303533513.

23 E-mail address: [marta.bortoletto@cognitiveneuroscience.it](mailto:marta.bortoletto@cognitiveneuroscience.it)

24

25 Prof. Marco Bove,

26 Department of Experimental Medicine, Section of Human Physiology, University of Genoa

27 Viale Benedetto XV 3, 16132 Genoa, Italy

28 E-mail: marco.bove@unige.it.

29

30 Keywords:

31 Information transfer, effective connectivity, interhemispheric inhibition, bimanual coordination,

32 corpus callosum, TMS-EEG, DTI

33 **Abstract (150 words)**

34 It has been theorized that hemispheric dominance and a more segregated information processing have  
35 evolved to overcome long conduction delay through the corpus callosum (TCD) but that this may still  
36 impact behavioral performance mostly in tasks requiring high timing accuracy. Nevertheless, a  
37 thorough understanding of the temporal features of interhemispheric communication is missing due  
38 to methodological shortcomings. Here, we show in the motor system that TCD can be measured from  
39 transcranial magnetic stimulation (TMS) -evoked potentials (TEPs): by integrating TEPs with  
40 diffusion tensor imaging (DTI) and peripheral measures of interhemispheric inhibition (i.e., the  
41 ipsilateral silent period- iSP), we show that P15 TEP component reflects TCD between motor areas.  
42 Importantly, we report that better bimanual coordination is achieved when TCD between motor areas  
43 is asymmetric. These results suggest that interhemispheric communication can be optimized through  
44 asymmetric connectivity, in which information transfer is faster from the dominant hemisphere to the  
45 non-dominant hemisphere.

46

47

## 48 **Introduction**

49 Conduction delay over long-range connections is a crucial feature of neural communication that  
50 impacts the efficacy of signal transmission between distant areas and thus influences the anatomo-  
51 functional architecture of the brain. Specifically, long transcallosal conduction delay (TCD) has been  
52 theorized to be the basis of hemispheric dominance: long TCD prevents the exchange of information  
53 between homologous cortical areas and favors the compartmentalization of signal processing (1–3).  
54 Such delays impact each transcallosal transfer of information regardless of the information conveyed,  
55 i.e., both when the processes of the two hemispheres must be integrated and when the two  
56 hemispheres exert mutual functional inhibition, possibly directed toward suppression of competing  
57 activation, as has been shown in the motor system (4). The impact of TCD on interhemispheric signal  
58 transmission may eventually have consequences on behavioral performance, becoming most apparent  
59 when tasks have strict timing constraints (1).

60 Despite the acknowledged importance of TCD in brain functioning and initial indications that TCD  
61 affects cognitive functions (5, 6), empirical support has been limited to date due to the lack of a direct  
62 noninvasive measure of TCD. Pioneering studies have exploited lateralized effects on reaction times  
63 and event-related potentials, but these effects may be affected by several stages along the processing  
64 stream (7–9). In relation to the motor system, estimates of TCD have been obtained with peripheral  
65 measures of transcallosal inhibition, such as the ipsilateral silent period (iSP) (10–14), but they are  
66 affected by the corticospinal tract. Consequently, it is not well understood how conduction delay in  
67 transcallosal connections affects lateralized processing and behavioral outcomes.

68 Coregistration of transcranial magnetic stimulation (TMS) and electroencephalography (EEG) has  
69 the potential to provide temporally precise cortical measures of effective connectivity through TMS-  
70 evoked potentials (TEPs): After the direct activation of a target region at the time of TMS, a secondary  
71 neural response is generated in distant connected regions, e.g., a homologous area connected via the  
72 corpus callosum, and this response is recorded through EEG (15). Importantly, the amplitude and

73 latency of the secondary response can be measured from the TEPs and reflect the strength and  
74 conduction delay of the connection, respectively.

75 In this work, we hypothesized that an early contralateral component of TMS-EEG coregistration  
76 could represent the response of the contralateral primary motor cortex (M1) after signal transmission  
77 through callosal fibers. In the following analyses, we show that a TEP component occurring at about  
78 15 ms (P15) reflects transcallosal inhibitory control of the contralateral motor area; Indeed, P15  
79 amplitude is related to inhibition of the contralateral M1 as measured by iSP. Importantly, P15 latency  
80 depends on the diffusivity of water molecules along the fibers of the callosal body, i.e., the section of  
81 the CC that connects homologous motor cortices. Therefore, P15 latency provides an index of TCD.  
82 With this new measure of effective connectivity, we tested the hypothesis that TCD impacts  
83 behavioral performance when interhemispheric activity has to be tuned with high timing accuracy.  
84 As behavioral task, we adopted a bimanual coordination task based on sequences of finger opposition  
85 movements. Previous studies have shown that time lag between hands is influenced by callosal  
86 integrity in multiple sclerosis (16) and in callosotomy and agenesis of CC (17, 18).

87 We show that asymmetry in TCD between motor cortices is beneficial for bimanual coordination:  
88 Specifically, shorter left-to-right TCD and longer right-to-left TCD resulted in better temporal  
89 performance in bimanual finger opposition movements. These findings suggest that, for in-phase  
90 bimanual movements, fast interhemispheric signal transmission per se (i.e., in both directions) is not  
91 as beneficial as an asymmetric interhemispheric signal transmission in which the TCD from the  
92 dominant M1 is shorter than the TCD from the nondominant M1.

93

## 94 **Results**

95 In our experiment (Fig. 1), we assessed the microstructural integrity of the corpus callosum by means  
96 of diffusion tensor imaging (DTI)-derived parameters (fractional anisotropy, mean diffusivity, radial  
97 diffusivity and axial diffusivity) as well as bimanual coordination performance during in-phase  
98 bimanual sequences of thumb-to-finger opposition movements in healthy subjects (n = 15).

99 Moreover, TEPs and iSP were collected from the left and right M1 separately during an iSP paradigm,  
100 in which the application of TMS over M1 induces a reduction in electromyographic activity of the  
101 ipsilateral target hand muscle due to transcallosal inhibition (11, 19). To increase the range of motor  
102 inhibition, we manipulated the activity of the contralateral hand by including a condition in which the  
103 hand was at rest (NoTask) and a condition in which subjects performed thumb-to-finger opposition  
104 movements (Task) (20). To account for the hierarchical structure of the design in which measures  
105 were repeated within subjects, e.g. data from Task and NoTask conditions and from left and right  
106 TMS, data were analyzed with linear mixed models.  
107

108

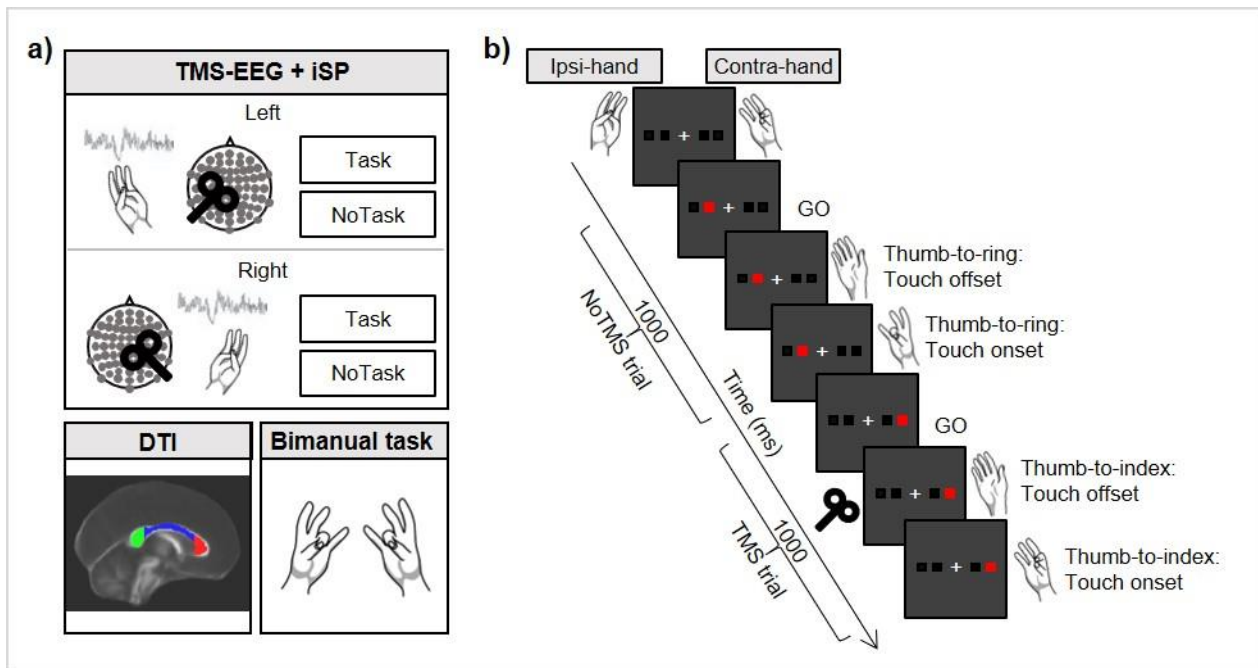

109

110 **Fig. 1 Study methods.** a) Main steps of the experimental procedure, consisting of a TMS-EEG and iSP session, DTI  
111 acquisition and an in-phase bimanual coordination task. During TMS-EEG, the left and right M1 were stimulated in  
112 separate blocks in an iSP paradigm, involving Task and NoTask conditions, in counterbalanced order. During both  
113 conditions, the thumb and the little finger of the ipsilateral hand were opposed, maintaining ~25% of maximal APB  
114 muscle contraction. iSP is a reduction in electromyographic activity in the APB muscle after TMS due to transcallosal  
115 inhibition. In the NoTask condition, participants kept the contralateral hand at rest, while in the Task condition, they  
116 performed the unimanual finger opposition movement sequence described in b). b) Two example trials of the Task  
117 condition, comprising one trial without and one trial with TMS over the left M1. On the contralateral hand, the thumb  
118 was opposed to the finger indicated by the red square on the PC screen. A TMS pulse was triggered by the touch offset  
119 in half of the trials.

120

121 The stimulation of the targeted M1 induced a complex TEP response (Fig. 2a), including an early  
122 component, i.e., the abovementioned P15. The latency of ~15ms falls in the range of TCD estimated  
123 from anatomical studies (2, 21) and double-coil TMS studies (4). The peak is located in the  
124 frontocentral sites of the contralateral hemisphere. The polarity is positive, in line with the  
125 relationship between positivity and inhibition that has been shown in motor areas. Importantly, P15  
126 was highly consistent and could be detected in every condition (Fig. 2b-c), and the same was true of  
127 the iSP (Table 1).

128 First, P15 was linked to contralateral motor inhibition: we found that P15 amplitude predicts the  
129 normalized iSP area ( $t = 3.33, p = 0.001$ ), such that the larger the P15, the stronger the inhibition will  
130 be in the ipsilateral *abductor pollicis brevis* (APB; Fig. 2d). No significant relationship was found  
131 between P15 latency and iSP onset ( $t = 1.19, p = 0.24$ ).

132 Moreover, as evidence that P15 reflects the timing of transcallosal connectivity, we assessed whether  
133 microstructural integrity of the corpus callosum predicts the latency of P15. We expected a significant  
134 relationship for the CC body, because this section connects the two primary motor areas. We found  
135 that P15 latency was predicted by the mean diffusivity of the CC body ( $t = -2.23, p = 0.04$ ) and not  
136 by its fractional anisotropy ( $t = -0.36, p = 0.73$ ). Crucially, the result concerning the mean diffusivity  
137 of the callosal body was explained by the diffusivity along the axons (axial diffusivity;  $t = -2.42, p =$   
138  $0.03$ ) and not by the radial diffusivity ( $t = -0.89, p = 0.39$ ): the higher the axial diffusivity, the shorter  
139 the latency of P15, i.e., shorter TCD (Fig. 2e). As a control, we tested that the relationship was specific  
140 for the callosal body and not for the other regions of the CC. Accordingly, no significant relationship  
141 was found for genu ( $t = -0.65, p = 0.53$ ) and splenium ( $t = -0.37, p = 0.72$ ).

142 Taken together, these results strongly support the idea that P15 reflects the transcallosal inhibition of  
143 M1 and that its latency represents the TCD along the fibers of the callosal body.

144



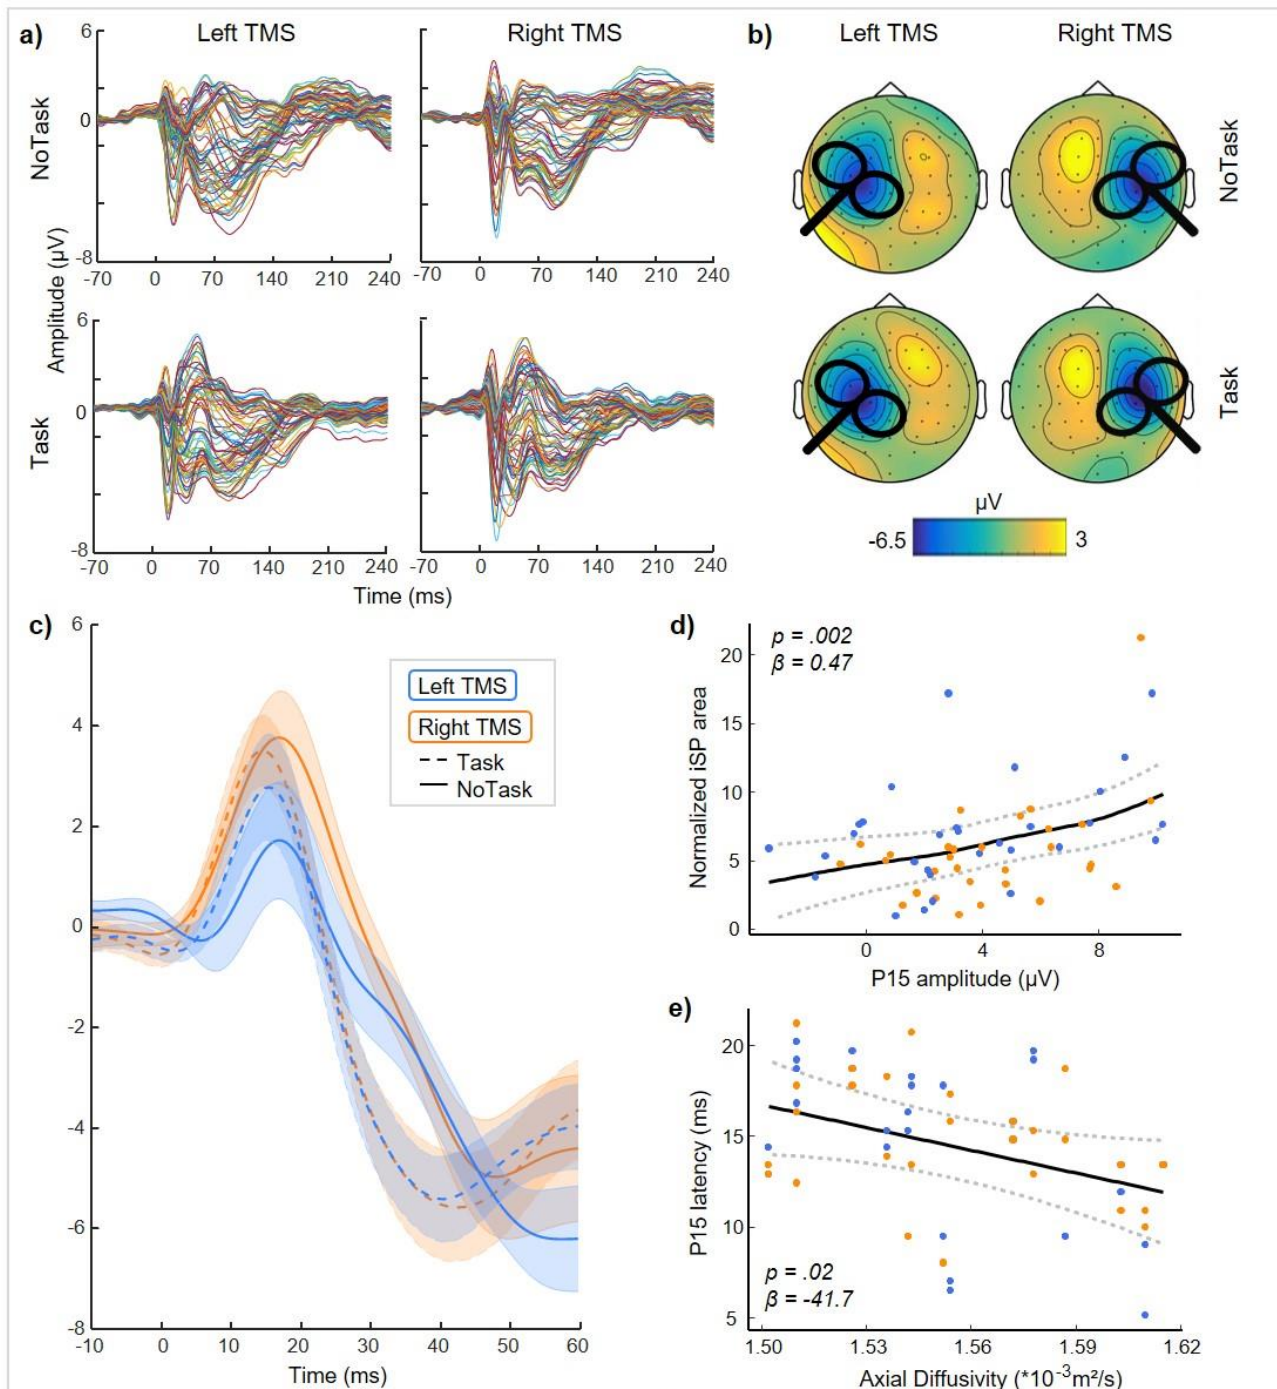

145

146 **Fig. 2 P15 as a measure of transcallosal effective connectivity.** a) Grand average of TEPs in the four experimental  
 147 conditions. b) Topographical maps of P15 showing a consistent pattern of positive activation in frontal electrodes  
 148 contralateral to TMS in the four experimental conditions. c) Grand average of P15 in the four experimental conditions  
 149 (SE in shaded error bars). P15 was identified in each participant and each condition as the first positive peak within a 5-  
 150 30 ms interval in pooled data from two frontal electrodes contralateral to TMS (F1 and FC1 for right TMS, F2 and FC2  
 151 for left TMS). d) Relationship between P15 amplitude and normalized iSP area: higher P15 is associated with greater iSP,  
 152 suggesting that P15 reflects transcallosal inhibition. e) Relationship between axial diffusivity in the body of the corpus  
 153 callosum and P15 latency: higher axial diffusivity predicts shorter P15 latency. In d) and e), blue dots indicate left TMS,  
 154 and orange dots indicate right TMS. Data from the Task and NoTask conditions were pooled together. Fitted curves were  
 155 carried out through smoothed spline methods applied to predicted values –obtained by bootstrap procedure– of the LMMs.  
 156

157 Our next goal was to test how TCD affects behavior. Based on previous studies (16), we expected  
158 that TCD between homologous motor areas could affect the temporal precision of motor performance  
159 when bilateral movements must be coordinated. Therefore, we calculated the inter-hand interval, i.e.,  
160 the time difference between taps with the right and left hand, during in-phase bimanual sequences of  
161 finger opposition movements.

162 We found that P15 latency for each direction of interhemispheric transfer separately predicts inter-  
163 hand interval, with opposite effects. P15 latency from left-to-right hemisphere positively predicted  
164 inter-hand interval ( $t = 2.49, p = 0.02$ ; Fig. 3a), such that shorter TCD resulted in a shorter inter-hand  
165 interval, i.e., better bimanual coordination. In the opposite direction, the shorter the right-to-left P15  
166 latency, the longer the inter-hand interval, indicating worse bimanual coordination ( $t = -2.2, p = 0.04$ ;  
167 Fig. 3b). Crucially, the best predictor of bimanual coordination as indicated by Akaike Information  
168 Criterion (AIC) method (22, 23) was the ratio of the P15 latency from the dominant (left) M1 to the  
169 P15 latency from the nondominant (right) M1 ( $t = 4.17, p = 0.001$ ; Fig. 3c). Finally, as a control  
170 condition, we tested the relationship between P15 latency and inter-hand interval during bimanual  
171 repetitive thumb-to-index-finger opposition movements. The corpus callosum seems to be less  
172 involved in this type of movement, as shown by a different effect induced by ipsilateral rTMS as a  
173 function of the complexity of finger motor sequences (24). In this case, the relationship between P15  
174 latency and inter-hand interval for repetitive movements did not reach statistical significance (left  
175 TMS:  $t = 0.36, p = 0.72$ ; right TMS:  $t = -1.98, p = 0.06$ ; left/right TMS:  $t = 1.93, p = 0.07$ ).

176 These data show that bimanual coordination benefits from an asymmetric TCD between homologous  
177 motor areas when signal transmission from the dominant to the nondominant hemisphere is faster  
178 than transmission in the opposite direction.

179

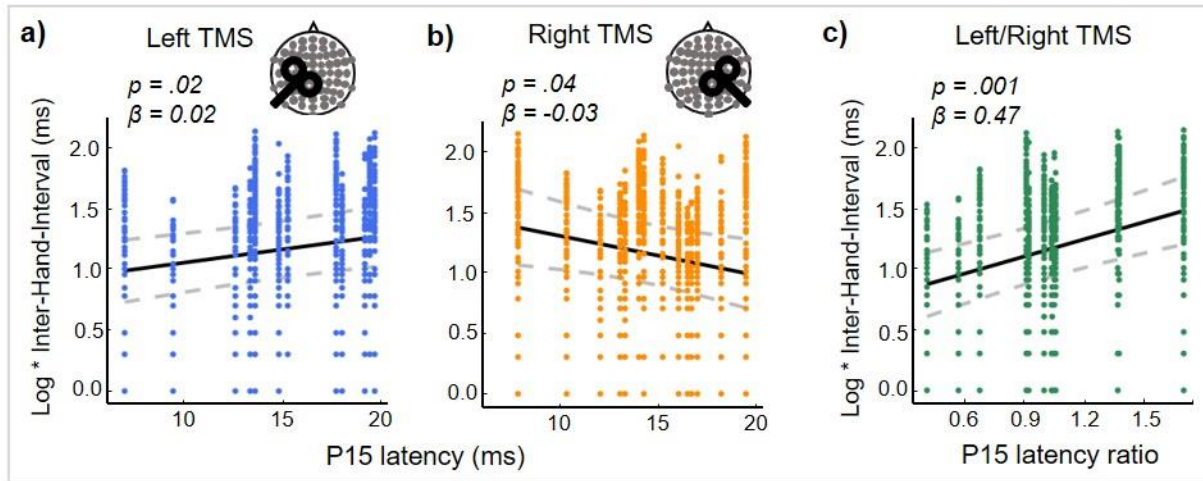

180

181 **Fig. 3 Asymmetric transcallosal conduction delay predicts finer bimanual coordination.** The relationship  
182 between P15 latency and performance in the in-phase bimanual coordination task depends on the stimulated  
183 hemisphere. a) When TMS is delivered over M1 in the dominant hemisphere (left TMS), shorter P15 latency  
184 is associated with finer bimanual coordination (positive relationship between P15 latency and inter-hand  
185 interval). b) Conversely, when TMS is applied over M1 in the nondominant hemisphere (right TMS), the  
186 shorter the P15 latency is, the worse the bimanual coordination will be (negative relationship between P15  
187 latency and inter-hand interval). c) Inter-hand interval is best predicted by the ratio of P15 latency following  
188 left TMS to P15 latency following right TMS, indicating that a shorter conduction delay from the dominant  
189 M1 to the nondominant M1 than in the opposite direction is associated with finer bimanual coordination. Fitted  
190 curves (linear trends) were carried out through smoothed spline methods applied to predicted values –obtained  
191 by bootstrap procedure- of the LMMs.

192

193 **Discussion**

194 The present results suggest that the temporal features are crucial in the communication between  
195 hemispheres and shape the final behavioral outcome.

196 The temporal synchronization of bilateral movements needs an efficient interaction between the two  
197 sides of the motor system to be performed with high level of precision. According to the model of  
198 neural cross-talk, motor commands are sent from each side both to the contralateral side of the  
199 corticospinal tract and, in a mirror version, to the ipsilateral side (25–27). Pathways allowing this  
200 interaction include interhemispheric connections through the CC and subcortical pathways (28). The  
201 relative conduction delay in each direction of the CC tract may affect how the signals from the two  
202 hemispheres interact and potentially interfere with each other. In this case, a better bimanual  
203 coordination with a more efficient signal transmission from the left motor cortex is in line with the  
204 well-known dominant role of the left hemisphere in the performance of bimanual movements and in  
205 movement sequences (29–31).

206 Considering that P15 reflects a functionally inhibitory signal, one possible mechanism is that prompt  
207 suppression of the nondominant motor area, conveyed through the CC as a functional inhibitory  
208 signal, may increase the efficiency of cross-talk at the corticospinal level, thus improving temporal  
209 coordination. In this case, information transfer through the CC would not be necessary to perform  
210 bimanual movements but it would optimize their coordination. Accordingly, previous studies have  
211 shown that the CC contributes to temporal control of in-phase discrete movements, although CC  
212 integrity is not essential for this task, as it can be performed after callosotomy and by acallosal patients  
213 (32, 33).

214 Alternatively, information transfer through the CC during the bimanual task may have a facilitatory  
215 function, rather than the inhibitory function that we observed during the iSP paradigm. Therefore, the  
216 cross-talk would occur at the cortical level. This possibility cannot be ruled out because we did not  
217 record TEPs during the bimanual task. Nevertheless, faster signal transmission from the dominant  
218 hemisphere than from the nondominant hemisphere would still pose an advantage in the case of

219 transcallosal functional facilitation, reducing the interference effects of intruding commands.  
220 Altogether, finer bimanual coordination would be reached when the transmission was asymmetric  
221 and gave a temporal advantage to the signal from the dominant hemisphere over the nondominant  
222 hemisphere, regardless of the information conveyed (i.e., either functional inhibition or signal  
223 transmission).  
224 Furthermore, the hemispheric asymmetry in P15 latency may arise from an asymmetry in the structure  
225 of callosal connections, thus expanding the notion of transcallosal cross-talk from a functional to a  
226 structural meaning. It can be suggested that asymmetric connectivity, in which only one direction of  
227 information processing is optimized, may be a consequence of the spatial and metabolic constraints  
228 that have limited evolutionary growth of the CC relative to brain size (34–36). This optimization  
229 would improve directional information transfer from the dominant to the non-dominant hemisphere,  
230 creating the base for hemispheric dominance.  
231 The positive relationship between P15 latency and the axial diffusivity of the callosal body is a crucial  
232 finding that supports the motion that P15 reflects the TCD. Accordingly, axial diffusivity represents  
233 the motion of water along the principal axis of the fibers rather than across it. In a healthy population,  
234 diffusivity measures may depend on several factors, including axonal diameter, myelin thickness,  
235 axon counts and density of packed fibers (37, 38). Importantly, regardless of the specific underlying  
236 anatomical characteristics, higher axial diffusivity can reflect better signal propagation.  
237 A TEP-based estimate of TCD may be very close to the actual TCD of the fiber tract, although it may  
238 be a slight overestimate due to the time required for TMS to activate pyramidal neurons in the target  
239 region, which takes less than 1 ms (39), and the time required for activation of local circuits in the  
240 connected area, which has been estimated to be approximately 1-2 ms. Moreover, although  
241 calculating TCD based on the peak of an EEG potential has the advantage of considering the moment  
242 in which the signal-to-noise ratio is the highest, signal onset may yield a more precise calculation.  
243 Given these considerations, P15 may include an overestimation of the TCD by approximately 2-3 ms,

244 but overall, the timing fits with the predictions of TCD derived from anatomical studies (2, 21) and  
245 from double-coil TMS studies (4).

246 The development of a noninvasive measure of TCD opens several new opportunities to study cortical  
247 connectivity and hemispheric asymmetries. Importantly, this approach can be extended to other  
248 cognitive domains involving other regions of the CC and other major intrahemispheric tracts.  
249 Eventually, it will be possible to integrate new knowledge on TCD in theoretical and computational  
250 models of interhemispheric interaction.

251

252 **Table 1.** Mean  $\pm$  SE

253 Descriptive statistics (mean  $\pm$  SE) of P15 amplitude, P15 latency and normalized iSP area in the four

254 experimental conditions (Left/Right TMS X Task/NoTask)

|                          | <i>P15 amplitude</i>    | <i>P15 latency</i> | <i>Normalized iSP area</i> |
|--------------------------|-------------------------|--------------------|----------------------------|
| <i>Left TMS, Task</i>    | 4.08 $\pm$ 0.93 $\mu$ V | 14.0 $\pm$ 1.2 ms  | 7.74 $\pm$ 0.91            |
| <i>Left TMS, NoTask</i>  | 3.09 $\pm$ 0.96 $\mu$ V | 14.9 $\pm$ 1.1 ms  | 6.34 $\pm$ 1.09            |
| <i>Right TMS, Task</i>   | 3.98 $\pm$ 0.65 $\mu$ V | 13.6 $\pm$ 0.8 ms  | 5.06 $\pm$ 0.49            |
| <i>Right TMS, NoTask</i> | 4.57 $\pm$ 0.81 $\mu$ V | 15.0 $\pm$ 1.0 ms  | 5.94 $\pm$ 1.20            |

255

256 **Methods**

257 *Participants*

258 Sixteen healthy participants gave written informed consent and participated in the two experimental  
259 sessions of the study within two weeks: Session 1 consisted of magnetic resonance imaging (MRI)  
260 examination, and session 2 consisted of the behavioral task and TMS-EEG for TEPs and iSP  
261 recording (Fig. 1). One participant was excluded from analyses due to technical problems during the  
262 TMS-EEG session. The final sample had mean age 35 years (range 26-47 years) and included 8  
263 females.

264 All participants were right-handed according to the Edinburgh Handedness Inventory (mean  $\pm$  SE:  
265  $81.5 \pm 4.6$ ), and they had no history of neurological disorders or contraindications to MRI or TMS.  
266 The study was performed in accordance with the ethical standards of the Declaration of Helsinki and  
267 was approved by the Ethical Committee of the IRCCS Istituto Centro San Giovanni di Dio  
268 Fatebenefratelli (Brescia) and by the Ethical Committee of the Hospital of Brescia.

269

270 *MRI acquisition*

271 MRI was performed on a 3 T MR system (Skyra, Siemens, Erlangen, Germany). In a single session,  
272 the following scans were collected from each subject: axial T2-weighted fluid-attenuated inversion  
273 recovery (FLAIR; repetition time (TR) 9000 ms, echo time (TE) 76 ms, inversion time (TI) 2500 ms,  
274 slice thickness 3 mm, distance factor 10%, 1 average, field of view (FOV) 220 mm, voxel size  
275  $0.6 \times 0.6 \times 3.00$  mm), DTI with spin-echo echo-planar axial sequences (multiband, TR 4100 ms, TE  
276 75.0 ms, 1.8 mm isotropic resolution, b 1000 s/mm<sup>2</sup>, 64 encoding directions, 5 b<sub>0</sub> images, fat  
277 suppression), and high-resolution T1-weighted 3D anatomical sequences (sagittal volume, TR 2400  
278 ms, TE 2 ms, 0.9 mm isotropic resolution).

279

280 *Bimanual coordination task*



281 Participants were seated in a comfortable chair in a quiet room, resting their forearms on a table, and  
282 were asked to perform an in-phase bimanual task before the TMS-EEG session. The task consisted  
283 of performing repetitive, metronome-paced thumb-to-finger opposition movements at 2 Hz with their  
284 eyes closed; participants performed the task with both hands simultaneously to assess bimanual  
285 coordination (16). The motor sequences consisted of simple finger tapping (thumb-to-index-finger  
286 opposition) and a 4-item sequence that consisted of opposing the thumb to the index, middle, ring  
287 and little fingers. Each condition was performed twice in separate trials lasting 45 s and separated by  
288 a few minutes of rest to avoid fatigue effects. Finger contacts were recorded by two specially designed  
289 gloves (GAS, ETT, s.p.a., Genoa, Italy) (40–42).

290

#### 291 *TMS-EEG acquisition*

292 Participants were comfortably seated in a dimly lit room in front of a computer screen, wearing an  
293 EEG cap and two gloves with integrated sensors. The participants were asked to perform two  
294 conditions (Task and NoTask) of an iSP paradigm in separate blocks while TMS-EEG was recorded.  
295 In the hand ipsilateral to the stimulation, the thumb and the little finger were opposed and contracted  
296 in both conditions (mean  $\pm$  SE of percentage of maximal contraction: Task condition, 23%  $\pm$  1;  
297 NoTask condition, 23%  $\pm$  2). The activity in the hand contralateral to the stimulation depended on  
298 the condition. In the Task condition (Fig. 1b), the contralateral hand performed a unimanual finger  
299 tapping task. Participants were presented with four white squares on the distal phalanges of the index,  
300 middle, ring and little fingers. The white squares turned red one at a time in random order, and  
301 participants were instructed to respond as quickly and accurately as possible by opposing the thumb  
302 to the corresponding finger. The block started with participants in a resting position, touching the tip  
303 of the index finger to the tip of the thumb. Upon the presentation of the stimuli, participants lifted  
304 their fingers (touch offset) and tapped their thumb to the finger indicated by the stimulus (touch  
305 onset). Stimuli lasted 1000 ms and were presented at a frequency of 1 Hz. The number of stimuli per  
306 block was 120. Before the beginning of the recording, participants performed one block of the task

307 with each hand to familiarize them with the task and to measure their reaction times (touch offset).  
308 Performance was not further analyzed in those blocks.

309 In the NoTask condition, participants saw the same stimuli as in the Task condition, but they were  
310 not required to perform any tapping with the contralateral hand, which was relaxed.

311 TMS over the M1 was randomly delivered in half of the trials, i.e., 60 pulses per block, at the time of  
312 touch offset measured by the engineered glove in the Task condition, and at the time of touch offset  
313 measured in the training block for the NoTask condition.

314 The stimulation was performed with a MagPro X100 including MagOption (MagVenture, Denmark)  
315 and set to deliver biphasic single pulses with a figure-of-eight C-B60 coil. The recharge delay was  
316 set at 500 ms. The coil was positioned tangentially to the scalp over the M1 hotspot, which was  
317 functionally localized as the position that induced reliable motor evoked potentials (MEPs) in the  
318 APB. The coil, with the handle pointing backward, was rotated away from the midline by  
319 approximately 45° so that the current induced in the cortex followed the optimal direction, i.e.,  
320 anterior to posterior and posterior to interior (AP-PA). The stimulation intensity (mean  $\pm$  SE: 58.1%  
321 of MSO  $\pm$  1.6%) was set at 110% of the individual average resting motor threshold (rMT), defined  
322 as the minimum TMS intensity to elicit an MEP of at least 50  $\mu$ V in 5 out of 10 trials (43).

323 In order to ensure the precision of stimulation, a stereotaxic neuronavigation system (SofTatic, EMS,  
324 Italy) was used in which the T1 anatomical MRI was coregistered to head position.

325 EEG was recorded with a TMS-compatible EEG system (BrainAmp, Brain Products GmbH, Munich,  
326 Germany) from 67 channels according to the international 10-20 system (sampling rate: 5 kHz; online  
327 bandpass filter: between 0.1 and 1 kHz). The ground was placed at FPz, and all channels were  
328 referenced online to the nose. The skin/electrode impedance was below 5 k $\Omega$ . Vertical and horizontal  
329 eye movements were monitored with an electrooculogram using two pairs of electrodes in a bipolar  
330 montage. Electromyography (EMG) was recorded from the APBs of both hands using a pair of  
331 surface electrodes with a belly-tendon montage. Before TMS-EEG, EMG was recorded for 30 s while  
332 participants were asked to touch the little finger to the thumb and to maintain the muscle contraction

333 at maximum strength. This recording was subsequently analyzed to calculate the relative contraction  
334 levels during TMS-EEG.

335

### 336 *DTI analysis*

337 DTI data were processed using FMRIB's Diffusion Toolbox (FDT) (44). After correction for eddy  
338 current distortions and motion artifacts, a diffusion tensor model was fitted at each voxel, and the  
339 three eigenvalues were calculated (45). Parametric maps were obtained for fractional anisotropy,  
340 mean diffusivity, axial diffusivity (i.e., water diffusivity parallel to the axonal fibers), and radial  
341 diffusivity (i.e., water diffusivity perpendicular to the axonal fibers) (38, 46). All these maps were  
342 then nonlinearly transformed and aligned to  $1 \times 1 \times 1$  mm standard space using tract-based spatial  
343 statistics (TBSS) routines (47). The mean value of each DTI-derived parameter was calculated for  
344 each scan in the voxels included in the callosal fibers within three ROIs (genu, body, and splenium)  
345 from the JHU ICBM 81 white matter label atlas included in FSL (48).

346

### 347 *Bimanual coordination assessment*

348 To quantitatively evaluate bimanual coordination performance, we calculated the inter-hand interval  
349 for each tap as time difference between the onset of a finger tap with the left hand and the onset of  
350 the corresponding finger tap with the right hand and removed inter-hand interval values that were  
351 greater than two standard deviations from the mean. Then, we calculated the absolute value for each  
352 tap: the longer the inter-hand interval value, the worse the bimanual coordination (16). Finally, we  
353 log-transformed the data to obtain normal distribution. Data from one participant were missing due  
354 to technical problems to the gloves.

355

### 356 *TMS-evoked potentials (TEPs)*

357 TMS-EEG data analysis was performed in MATLAB (The MathWorks, Natick, MA, USA) with  
358 custom scripts using EEGLAB functions (49), FieldTrip functions (50), the source-estimate-utilizing

359 noise-discarding (SOUND) algorithm (51) and the signal-space projection and source-informed  
360 reconstruction (SSP-SIR) algorithm (52). Continuous EEG was linearly interpolated from 1 ms before  
361 to 6 ms after the TMS pulse and high-pass filtered at 0.1 Hz. TMS-EEG data were then epoched from  
362 -200 ms before to 500 ms after TMS and downsampled to 2048 Hz. Measurement noise was discarded  
363 with the SOUND algorithm with the same spherical 3-layer model and regularization parameter ( $\lambda =$   
364 0.01) described in the original work (51). After the application of the SOUND algorithm, the signal  
365 was visually inspected, and initial artifact rejection was performed; then, independent component  
366 analysis (ICA; infomax algorithm) was run to correct ocular artifacts. TMS-evoked muscular artifacts  
367 in the first 50 ms were removed using SSP-SIR, a method based on signal-space projection and  
368 source-informed reconstruction. Muscle-artifact components (0-3 in each dataset) were identified  
369 from the time-frequency pattern and corresponding signal power. Then, epochs were low-pass filtered  
370 at 70 Hz and re-referenced to the average of TP9 and TP10. Finally, after a second visual inspection  
371 and artifact rejection, TMS-EEG data were baseline corrected from -100 ms to -2 ms before the TMS  
372 pulse and averaged. P15 amplitude and latency were measured by identifying each individual  
373 subject's first positive peak between 5 and 30 ms in pooled data from two frontocentral channels (F2-  
374 FC2 for left TMS, F1-FC1 for right TMS).

375

### 376 *Ipsilateral silent period (iSP)*

377 iSP parameters were assessed in the trace obtained from averaging the 60 rectified EMG traces (11).  
378 The following iSP parameters were considered: the iSP onset, defined as the point after cortical  
379 stimulation at which EMG activity became constantly (for a minimum duration 10 ms) below the  
380 mean amplitude of EMG activity preceding the cortical stimulus; the iSP duration, calculated by  
381 subtracting the onset time from the ending time (i.e., the first point after iSP onset at which the level  
382 of EMG activity returned to the mean EMG signal); and the normalized iSP area, calculated using  
383 the following formula: [(area of the rectangle defined as the mean EMG  $\times$  iSP duration)–(area  
384 underneath the iSP)] divided by the EMG signal preceding the cortical stimulus.

385

386 *Statistical analysis*

387 Relationships between variables were tested by linear mixed models (LMMs) with random slope and  
388 intercept (53). A summary is reported in table S1 in Supplementary materials. Akaike information  
389 Criterion (AIC) was used to find the best predictors in terms of model goodness of fit.

390 To test the relationship between P15 amplitude (repeated independent variable) and iSP normalized  
391 area (repeated dependent variable), a LMM was run with Condition (4 levels: Task, NoTask,  
392 LeftTMS, RightTMS) and Subjects as fixed and random effects, respectively, with each condition  
393 repeated within Subjects. The same model was employed to evaluate the relationship between P15  
394 latency and iSP onset.

395 To study the predictive value of microstructural integrity of CC body (i.e., DTI measures as  
396 independent variables) on P15 latency (dependent variable), two separate LMMs were applied for  
397 fractional anisotropy and mean diffusivity of CC body. Moreover, we tested the direction of  
398 diffusivity in the CC body that predicted P15 latency by employing axial or radial diffusivity as  
399 predictors in two separate LMMs. In addition, mean diffusivity for other regions of the CC was  
400 evaluated by carrying out other two LMMs with P15 latency as dependent variable and CC genu and  
401 CC splenium as predictors.

402 Finally, we tested the relationship between P15 latency (as predictor) and bimanual coordination  
403 performance (i.e., inter-hand interval, as dependent variable) in a sequential thumb-to-finger  
404 opposition movement task. Separate LMMs were performed considering the three measures of P15  
405 latency (i.e. mean value of Task and NoTask condition in: Left TMS, Right TMS and the rate between  
406 the two) as predictors, each tap (Tap) of the bimanual task as fixed effect and Subjects as random  
407 effect (with Tap repeated within Subjects). The same models were run for the repetitive thumb-to-  
408 index finger opposition movements task.

409 The predicted values (and corresponding standard error) of the LMMs were obtained by bootstrap procedure  
410 (number of simulation n=500). Fitted curves of predicted values were carried out through smoothed spline  
411 methods.

412 Statistical significance was set at  $p < 0.05$ . All the analyses were performed in R software (R Core  
413 Team (2013), <http://www.R-project.org/>.) and LMM were estimated by lme4 R package.

414

#### 415 **Acknowledgements:**

416 This work was supported by the Italian multiple sclerosis foundation (FISM) Grant 2016/R/2.

417 We would like to thank Alice Bollini and Simona Finazzi for their support with data acquisition.

418

#### 419 **Contributions**

420 M. Bortoletto, L.B., R.G., C.M. and M. Bove designed the research. M. Bortoletto, L.B. and R.G.  
421 performed experiments. M. Bortoletto, L.B., A.Z., L.P., C.F. performed data analyses. M. Bortoletto,  
422 L.B., A.Z., C.M., M. Bove wrote the manuscript. All authors critically reviewed data and edited the  
423 final manuscript.

424

#### 425 **Ethics declarations**

426 Competing interests

427 The authors declare no competing interests.

428

#### 429 **Data availability**

430 The data that support the findings of this study are available from the authors on reasonable request.

431

432 **References**

- 433 1. J. L. Ringo, R. W. Doty, S. Demeter, P. Y. Simard, Time Is of the Essence: A Conjecture  
434 That Hemispheric Specialization Arises From Interhemispheric Conduction Delay. *Cereb.*  
435 *Cortex* **4**, 331–43 (1994).
- 436 2. K. A. Phillips, *et al.*, The corpus callosum in primates : processing speed of axons and the  
437 evolution of hemispheric asymmetry. *Proc. R. Soc. B Biol. Sci.* **282**, 20151535 (2015).
- 438 3. V. R. Karolis, M. Corbetta, M. T. De Schotten, The architecture of functional lateralisation  
439 and its relationship to callosal connectivity in the human brain. *Nat. Commun.* **10**, 1417  
440 (2019).
- 441 4. A. Ferbert, *et al.*, Interhemispheric Inhibition of the Human Motor Cortex. *J. Physiol.* **453**,  
442 525–546 (1992).
- 443 5. M. J. Hoptman, R. J. Davidson, How and why do the two cerebral hemispheres interact?  
444 *Psychol. Bull.* **116**, 195–219 (1994).
- 445 6. N. Cherbuin, C. Brinkman, Efficiency of callosal transfer and hemispheric interaction.  
446 *Neuropsychology* **20**, 178–184 (2006).
- 447 7. C. A. Marzi, P. Bisiacchi, R. Nicoletti, Is interhemispheric transfer of visuomotor  
448 information asymmetric? Evidence from a meta-analysis. *Neuropsychologia* **29**, 1163–1177  
449 (1991).
- 450 8. R. Chaumillon, J. Blouin, A. Guillaume, Eye dominance influences triggering action: The  
451 Poffenberger paradigm revisited. *Cortex* **58**, 86–98 (2014).
- 452 9. R. Chaumillon, J. Blouin, A. Guillaume, Interhemispheric transfer time asymmetry of visual  
453 information depends on eye dominance: An electrophysiological study. *Front. Neurosci.* **12**,  
454 1–19 (2018).
- 455 10. T. Davidson, F. Tremblay, Hemispheric Differences in Corticospinal Excitability and in  
456 Transcallosal Inhibition in Relation to Degree of Handedness. *PLoS One* **8**, 1–9 (2013).
- 457 11. C. Trompetto, M. Bove, L. Marinelli, L. Avanzino, A. Buccolieri, Suppression of the

- 458           transcallosal motor output : a transcranial magnetic stimulation study in healthy subjects.  
459           *Exp. brain Res.* **158**, 133–140 (2004).
- 460 12.   B. W. Fling, B. L. Benson, R. D. Seidler, Transcallosal sensorimotor fiber tract structure-  
461           function relationships. *Hum. Brain Mapp.* **34**, 384–395 (2013).
- 462 13.   B. U. Meyer, S. Röricht, C. Woiciechowsky, Topography of fibers in the human corpus  
463           callosum mediating interhemispheric inhibition between the motor cortices. *Ann. Neurol.* **43**,  
464           360–369 (1998).
- 465 14.   B. U. Meyer, S. Röricht, H. G. Von Einsiedel, F. Kruggel, A. Weindl, Inhibitory and  
466           excitatory interhemispheric transfers between motor cortical areas in normal humans and  
467           patients with abnormalities of the corpus callosum. *Brain* **118**, 429–440 (1995).
- 468 15.   M. Bortoletto, D. Veniero, G. Thut, C. Miniussi, The contribution of TMS – EEG  
469           coregistration in the exploration of the human cortical connectome. *Neurosci. Biobehav. Rev.*  
470           **49**, 114–124 (2015).
- 471 16.   L. Bonzano, *et al.*, Callosal Contributions to Simultaneous Bimanual Finger Movements. *J.*  
472           *Neurosci.* **28**, 3227–3233 (2008).
- 473 17.   C. Ouimet, *et al.*, Bimanual crossed-uncrossed difference and asynchrony of normal,  
474           anterior- and totally-split-brain individuals. *Neuropsychologia* **48**, 3802–3814 (2010).
- 475 18.   J. C. Eliassen, K. Baynes, M. S. Gazzaniga, Anterior and posterior callosal contributions to  
476           simultaneous bimanual movements of the hands and fingers. *Brain* **123**, 2501–2511 (2000).
- 477 19.   M. Wahl, *et al.*, Human motor corpus callosum: Topography, somatotopy, and link between  
478           microstructure and function. *J. Neurosci.* **27**, 12132–12138 (2007).
- 479 20.   F. Giovannelli, *et al.*, Modulation of interhemispheric inhibition by volitional motor activity:  
480           An ipsilateral silent period study. *J. Physiol.* **587**, 5393–5410 (2009).
- 481 21.   R. Caminiti, *et al.*, Diameter, length, speed, and conduction delay of callosal axons in  
482           macaque monkeys and humans: Comparing data from histology and magnetic resonance  
483           imaging diffusion tractography. *J. Neurosci.* **33**, 14501–14511 (2013).



- 484 22. K. P. Burnham, D. R. Anderson, *Model Selection and Multimodel Inference: A Practical*  
485 *Information-Theoretic Approach (2nd ed)* (2002).
- 486 23. K. P. Burnham, D. R. Anderson, Multimodel inference: Understanding AIC and BIC in  
487 model selection. *Sociol. Methods Res.* **33**, 261–304 (2004).
- 488 24. L. Avanzino, *et al.*, 1-Hz repetitive TMS over ipsilateral motor cortex influences the  
489 performance of sequential finger movements of different complexity. **27**, 1285–1291 (2008).
- 490 25. D. Cattaert, A. Semjen, J. J. Summers, Simulating a neural cross-talk model for between-  
491 hand interference during bimanual circle drawing. *Biol. Cybern.* **358**, 343–358 (1999).
- 492 26. Y. Aramaki, M. Honda, N. Sadato, Suppression of the non-dominant motor cortex during  
493 bimanual symmetric finger movement: a functional magnetic resonance imaging study.  
494 *Neuroscience* **141**, 2147–2153 (2006).
- 495 27. U. Ziemann, M. Hallett, Hemispheric asymmetry of ipsilateral motor cortex activation during  
496 unimanual motor tasks : further evidence for motor dominance. *Clin. Neurophysiol.* **112**,  
497 107–113 (2001).
- 498 28. R. B. Ivry, E. Hazeltine, *Subcortical locus of temporal coupling in the bimanual movements*  
499 *of a callosotomy patient* (1999).
- 500 29. G. M. Geffen, D. L. Jones, L. B. Geffen, Interhemispheric control of manual motor activity.  
501 *Behav. Brain Res.* **64**, 131–140 (1994).
- 502 30. D. J. Serrien, R. B. Ivry, S. P. Swinnen, Dynamics of hemispheric specialization and  
503 integration in the context of motor control. **7**, 160–167 (2006).
- 504 31. L. M. Rueda-Delgado, *et al.*, Understanding bimanual coordination across small time scales  
505 from an electrophysiological perspective. *Neurosci. Biobehav. Rev.* **47**, 614–635 (2014).
- 506 32. S. W. Kennerley, J. Diedrichsen, E. Hazeltine, A. Semjen, R. B. Ivry, Callosotomy patients  
507 exhibit temporal uncoupling during continuous bimanual movements. *Nat. Neurosci.* **5**, 376–  
508 381 (2002).
- 509 33. J. Gooijers, S. P. Swinnen, Interactions between brain structure and behavior: The corpus

- 510 callosum and bimanual coordination. *Neurosci. Biobehav. Rev.* **43**, 1–19 (2014).
- 511 34. R. Caminiti, H. Ghaziri, R. Galuske, P. R. Hof, G. M. Innocenti, Evolution amplified  
512 processing with temporally dispersed slow neuronal connectivity in primates. *PNAS* **106**,  
513 19551–6 (2009).
- 514 35. S. Herculano-Houzel, B. Mota, P. Wong, J. H. Kaas, Connectivity-driven white matter  
515 scaling and folding in primate cerebral cortex. *Proc. Natl. Acad. Sci. U. S. A.* **107**, 19008–  
516 19013 (2010).
- 517 36. W. D. Hopkins, M. Misiura, S. M. Pope, E. M. Latash, Behavioral and brain asymmetries in  
518 primates: A preliminary evaluation of two evolutionary hypotheses. *Ann. N. Y. Acad. Sci.*  
519 **1359**, 65–83 (2015).
- 520 37. F. Aboitiz, A. B. Scheibel, R. S. Fisher, E. Zaidel, Fiber composition of the human corpus  
521 callosum. *Brain Res.* **598**, 143–153 (1992).
- 522 38. C. Beaulieu, *The Biological Basis of Diffusion Anisotropy* (Elsevier Inc., 2009)  
523 <https://doi.org/10.1016/B978-0-12-374709-9.00006-7>.
- 524 39. J. K. Mueller, *et al.*, Simultaneous transcranial magnetic stimulation and single-neuron  
525 recording in alert non-human primates. *Nat. Neurosci.* **17**, 1130–1136 (2014).
- 526 40. A. Signori, *et al.*, Quantitative assessment of finger motor performance : Normative data.  
527 *PLoS One* **12**, e0186524 (2017).
- 528 41. M. Bove, *et al.*, The effects of rate and sequence complexity on repetitive finger movements.  
529 *Brain Res.* **1153**, 84–91 (2007).
- 530 42. L. Bonzano, *et al.*, Quantitative Assessment of Finger Motor Impairment in Multiple  
531 Sclerosis. *PLoS One* **8**, 1–7 (2013).
- 532 43. S. Rossi, M. Hallett, P. M. Rossini, A. Pascual-Leone, Safety, ethical considerations, and  
533 application guidelines for the use of transcranial magnetic stimulation in clinical practice and  
534 research. *Clin. Neurophysiol.* **120**, 2008–2039 (2009).
- 535 44. S. M. Smith, *et al.*, Advances in functional and structural MR image analysis and

- 536 implementation as FSL. *Neuroimage* **23**, 208–219 (2004).
- 537 45. B. P.J., Inferring Microstructural Features and the Physiological State of Tissues from  
538 Diffusion Weighted Images. *NMR Biomed.* **8**, 333–344 (1995).
- 539 46. L. Bonzano, *et al.*, NeuroImage Upper limb motor rehabilitation impacts white matter  
540 microstructure in multiple sclerosis. *Neuroimage* **90**, 107–116 (2014).
- 541 47. S. M. Smith, *et al.*, Tract-based spatial statistics: Voxelwise analysis of multi-subject  
542 diffusion data. *Neuroimage* **31**, 1487–1505 (2006).
- 543 48. S. Mori, S. Wakana, P. C. M. Van Zijl, L. M. Nagae-Poetscher, *MRI atlas of human white*  
544 *matter* (Elsevier, 2005).
- 545 49. A. Delorme, S. Makeig, EEGLAB: an open source toolbox for analysis of single-trial EEG  
546 dynamics including independent component analysis. *J. Neurosci. Methods* **134**, 9–21  
547 (2004).
- 548 50. R. Oostenveld, P. Fries, E. Maris, J. M. Schoffelen, FieldTrip: Open source software for  
549 advanced analysis of MEG, EEG, and invasive electrophysiological data. *Comput. Intell.*  
550 *Neurosci.* **2011** (2011).
- 551 51. T. P. Mutanen, J. Metsomaa, S. Liljander, R. J. Ilmoniemi, NeuroImage Automatic and  
552 robust noise suppression in EEG and MEG : The SOUND algorithm. *Neuroimage* **166**, 135–  
553 151 (2018).
- 554 52. T. P. Mutanen, *et al.*, NeuroImage Recovering TMS-evoked EEG responses masked by  
555 muscle artifacts. *Neuroimage* **139**, 157–166 (2016).
- 556 53. A. Galecki, T. Burzykowski, *Linear Mixed-Effects Models Using R: A Step-by-Step*  
557 *Approach* (Springer-Verlag New York, 2013) <https://doi.org/10.1007/978-1-4614-3900-4>.
- 558

|                                                                | Dependent variable                               | Independent variable             | Fixed factor repeated within Subjects | $\beta$ | $t$   | $p$     | AIC    |
|----------------------------------------------------------------|--------------------------------------------------|----------------------------------|---------------------------------------|---------|-------|---------|--------|
| <b><i>I) P15 amplitude and iSP</i></b>                         |                                                  |                                  |                                       |         |       |         |        |
| Ia)                                                            | Normalized iSP area                              | P15 amplitude                    | Condition (4 measures per subject)    | 0.47    | 3.33  | 0.002 * | 326.7  |
| Ib)                                                            | iSP onset                                        | P15 latency                      | Condition (4 measures per subject)    | 195.11  | 1.19  | 0.24    | 375.7  |
| <b><i>II) CC microstructural integrity and P15 latency</i></b> |                                                  |                                  |                                       |         |       |         |        |
| IIa)                                                           | P15 latency                                      | Fractional anisotropy of CC body | Condition (4 measures per subject)    | -0.02   | -0.36 | 0.73    | -500.7 |
| IIb)                                                           | P15 latency                                      | Mean diffusivity of CC body      | Condition (4 measures per subject)    | -68.58  | -2.23 | 0.04 *  | -504.2 |
| IIc)                                                           | P15 latency                                      | Mean diffusivity of CC splenium  | Condition (4 measures per subject)    | -6.13   | -0.37 | 0.72    | -500.7 |
| IId)                                                           | P15 latency                                      | Mean diffusivity of CC genu      | Condition (4 measures per subject)    | -22.2   | -0.65 | 0.53    | -501.0 |
| IIe)                                                           | P15 latency                                      | Axial diffusivity of CC body     | Condition (4 measures per subject)    | -41.66  | -2.42 | 0.02 *  | -505.4 |
| IIf)                                                           | P15 latency                                      | Radial diffusivity of CC body    | Condition (4 measures per subject)    | -28.48  | -0.89 | 0.39    | -501.2 |
| <b><i>III) P15 latency and bimanual coordination</i></b>       |                                                  |                                  |                                       |         |       |         |        |
| IIIa)                                                          | Inter-hand interval (thumb-to-finger sequence)   | P15 amplitude (left TMS)         | Tap (91 measures per subject)         | 0.02    | 2.49  | 0.02 *  | 1605.7 |
| IIIb)                                                          | Inter-hand interval (thumb-to-finger sequence)   | P15 amplitude (right TMS)        | Tap (91 measures per subject)         | -0.03   | -2.2  | 0.04 *  | 1603.3 |
| IIIc)                                                          | Inter-hand interval (thumb-to-finger sequence)   | P15 amplitude (left/right TMS)   | Tap (91 measures per subject)         | 0.47    | 4.17  | 0.001 * | 1596.4 |
| IIId)                                                          | Inter-hand interval (thumb-to-index repetitions) | P15 amplitude (left TMS)         | Tap (81 measures per subject)         | 0.003   | 0.36  | 0.72    | 1264.6 |
| IIIe)                                                          | Inter-hand interval (thumb-to-index repetitions) | P15 amplitude (right TMS)        | Tap (81 measures per subject)         | -0.02   | -1.98 | 0.06    | 1261.8 |
| IIIf)                                                          | Inter-hand interval (thumb-to-index repetitions) | P15 amplitude (left/right TMS)   | Tap (81 measures per subject)         | 0.19    | 1.93  | 0.07    | 1260.7 |

**Table S1.** Structure and results of LMMs. All models include subjects as random factor.  $\beta$ ,  $t$  and  $p$  values refer to the independent variable. Asterisks indicates significant effects ( $p < 0.05$ ).
